# Supplementary material for: Antimicrobial Resistance of Salmonella Strains Isolated from Human, Wild Boar, and Environmental Samples in 2018–2020 in the Northwest of Italy
Source: MDPI journal article supplement (doi:10.3390/pathogens11121446), 2022-11-30
Supplement: s1 [file s1]

Table S1. Frequency of AMR profiles in *Salmonella* subtypes and serotypes identified in human and wild boar infections and in environmental samples.

| <i>Source</i> | <i>Serotype</i>                                       | <i>AMR profile</i>      | <i>N. isolates</i> | <i>%</i> |
|---------------|-------------------------------------------------------|-------------------------|--------------------|----------|
| Environment   | 6,7:c:1,5                                             | STR                     | 1                  | 0.4      |
| Environment   | 6,7:c:1,5                                             | STR-SSS                 | 1                  | 0.4      |
| Environment   | Typhimurium 1.4.[5].12:i:-                            | AMP-STR-SSS-TET         | 1                  | 0.4      |
| Environment   | Typhimurium 1.4.[5].12:i:-                            | TET-TGC                 | 3                  | 1.2      |
| Environment   | Brandenburg                                           | SSS-TET                 | 1                  | 0.4      |
| Environment   | Cerro                                                 | SSS                     | 1                  | 0.4      |
| Environment   | Coeln                                                 | SSS                     | 1                  | 0.4      |
| Environment   | Coeln                                                 | SSS-TET                 | 1                  | 0.4      |
| Environment   | Eingedi                                               | SSS-TET                 | 1                  | 0.4      |
| Environment   | Fann                                                  | SSS                     | 1                  | 0.4      |
| Environment   | Goldcoast                                             | AZI-CIP-TET-TGC-SXT     | 1                  | 0.4      |
| Environment   | Ilugun                                                | STR                     | 1                  | 0.4      |
| Environment   | Kapemba,                                              | GEN                     | 1                  | 0.4      |
| Environment   | Kottbus,                                              | SSS                     | 2                  | 0.8      |
| Environment   | London                                                | AZI-GEN-SXT             | 1                  | 0.4      |
| Environment   | Napoli                                                | SSS                     | 4                  | 1.5      |
| Environment   | Napoli                                                | SSS-SXT                 | 2                  | 0.8      |
| Environment   | Rissen                                                | AZI-GEN-TET-TGC-SXT     | 1                  | 0.4      |
| Environment   | Stourbridge                                           | AMC-AMP                 | 1                  | 0.4      |
| Environment   | Stourbridge                                           | AZI-GEN-SXT             | 2                  | 0.8      |
| Environment   | Stourbridge                                           | SSS                     | 1                  | 0.4      |
| Environment   | Thompson                                              | SSS                     | 2                  | 0.8      |
| Environment   | Thompson                                              | STR                     | 1                  | 0.4      |
| Environment   | Thompson                                              | STR-SSS                 | 1                  | 0.4      |
| Environment   | Veneziana                                             | AMC-GEN                 | 1                  | 0.4      |
| Environment   | Veneziana                                             | AZI-GEN-SXT             | 1                  | 0.4      |
| Environment   | Veneziana                                             | GEN                     | 1                  | 0.4      |
| Environment   | Veneziana                                             | SSS                     | 7                  | 2.7      |
| Environment   | <i>S. enterica</i> subsp. <i>enterica</i> (non-typed) | GEN-SSS                 | 1                  | 0.4      |
| Environment   | <i>S. enterica</i> subsp. <i>enterica</i> (non-typed) | SSS                     | 5                  | 1.9      |
| Environment   | <i>S. enterica</i> subsp. <i>enterica</i> (non-typed) | STR                     | 1                  | 0.4      |
| Environment   | <i>S. enterica</i> subsp. <i>enterica</i> (non-typed) | STR-SSS                 | 2                  | 0.8      |
| Environment   | <i>S. enterica</i> subsp. <i>enterica</i> (non-typed) | AZI-CIP-GEN-SXT         | 1                  | 0.4      |
| Environment   | <i>S. enterica</i> subsp. <i>enterica</i> (non-typed) | AZI-GEN-SXT             | 1                  | 0.4      |
| Environment   | <i>S. enterica</i> subsp. <i>enterica</i> (non-typed) | GEN-SSS-TET             | 1                  | 0.4      |
| Environment   | <i>S. enterica</i> subsp. <i>enterica</i> (non-typed) | GEN-SSS-SXT             | 1                  | 0.4      |
| Environment   | <i>S. enterica</i> subsp. <i>enterica</i> (non-typed) | GEN-STR-SSS             | 1                  | 0.4      |
| Environment   | <i>S. enterica</i> subsp. <i>enterica</i> (non-typed) | SSS                     | 5                  | 1.9      |
| Environment   | <i>S. enterica</i> subsp. <i>enterica</i> (non-typed) | SSS-SXT                 | 3                  | 1.2      |
| Environment   | <i>S. enterica</i> subsp. <i>salamae</i>              | SSS                     | 1                  | 0.4      |
| Environment   | <i>S. enterica</i> subsp. <i>salamae</i>              | STR-SSS                 | 1                  | 0.4      |
| Environment   | <i>S. enterica</i> subsp. <i>diarizonae</i>           | STR                     | 5                  | 1.9      |
| Human         | 6,7:c:1,5                                             | AMP-CHL-STR             | 1                  | 0.4      |
| Human         | 6,7:c:1,5                                             | AMP-CHL-STR-SSS-TET-SXT | 1                  | 0.4      |
| Human         | 6,7:c:1,5                                             | AMP-STR-SSS-NAL-SXT     | 1                  | 0.4      |
| Human         | Typhimurium 1.4.[5].12:i:-                            | AMC-AMP-CHL-STR-SSS-TET | 1                  | 0.4      |

|       |                            |                             |    |     |
|-------|----------------------------|-----------------------------|----|-----|
| Human | Typhimurium 1.4.[5].12:i:- | AMC-AMP-CHL-STR-TET-TGC     | 2  | 0.8 |
| Human | Typhimurium 1.4.[5].12:i:- | AMC-AMP-FOX-CHL-STR-SSS-TET | 1  | 0.4 |
| Human | Typhimurium 1.4.[5].12:i:- | AMC-AMP-STR-TET-TGC         | 3  | 1.2 |
| Human | Typhimurium 1.4.[5].12:i:- | AMC-STR-TET-TGC             | 1  | 0.4 |
| Human | Typhimurium 1.4.[5].12:i:- | AMP-CHL-STR-SSS-TET         | 8  | 3.1 |
| Human | Typhimurium 1.4.[5].12:i:- | AMP-CHL-STR-SSS-SXT         | 2  | 0.8 |
| Human | Typhimurium 1.4.[5].12:i:- | AMP-CHL-STR-TET-TGC         | 4  | 1.5 |
| Human | Typhimurium 1.4.[5].12:i:- | AMP-FOX-TAZ-STR-SSS         | 1  | 0.4 |
| Human | Typhimurium 1.4.[5].12:i:- | AMP-FOX-TAZ-STR-SSS-TET     | 1  | 0.4 |
| Human | Typhimurium 1.4.[5].12:i:- | AMP-GEN-STR-TET-TGC         | 3  | 1.2 |
| Human | Typhimurium 1.4.[5].12:i:- | AMP-SSS                     | 3  | 1.2 |
| Human | Typhimurium 1.4.[5].12:i:- | AMP-SSS-TET                 | 1  | 0.4 |
| Human | Typhimurium 1.4.[5].12:i:- | AMP-STR                     | 1  | 0.4 |
| Human | Typhimurium 1.4.[5].12:i:- | AMP-STR-SSS                 | 3  | 1.2 |
| Human | Typhimurium 1.4.[5].12:i:- | AMP-STR-SSS-TET             | 13 | 5.0 |
| Human | Typhimurium 1.4.[5].12:i:- | AMP-STR-SSS-SXT-            | 5  | 1.9 |
| Human | Typhimurium 1.4.[5].12:i:- | AMP-STR-TET                 | 1  | 0.4 |
| Human | Typhimurium 1.4.[5].12:i:- | AMP-STR-TET-TGC             | 14 | 5.4 |
| Human | Typhimurium 1.4.[5].12:i:- | AMP-TAZ-STR-SSS-TET         | 1  | 0.4 |
| Human | Typhimurium 1.4.[5].12:i:- | AMP-TAZ-STR-TET             | 1  | 0.4 |
| Human | Typhimurium 1.4.[5].12:i:- | AMP-TET                     | 9  | 3.5 |
| Human | Typhimurium 1.4.[5].12:i:- | CHL-TET-TGC                 | 1  | 0.4 |
| Human | Typhimurium 1.4.[5].12:i:- | SSS                         | 6  | 2.3 |
| Human | Typhimurium 1.4.[5].12:i:- | SSS-NAL                     | 1  | 0.4 |
| Human | Typhimurium 1.4.[5].12:i:- | SSS-TET                     | 3  | 1.2 |
| Human | Typhimurium 1.4.[5].12:i:- | STR                         | 1  | 0.4 |
| Human | Typhimurium 1.4.[5].12:i:- | STR-TET-TGC                 | 2  | 0.8 |
| Human | Typhimurium 1.4.[5].12:i:- | TET                         | 1  | 0.4 |
| Human | Typhimurium 1.4.[5].12:i:- | TET-TGC                     | 6  | 2.3 |
| Human | Brandenburg                | SSS                         | 1  | 0.4 |
| Human | Bredeney                   | AMC-STR-SSS-TET             | 1  | 0.4 |
| Human | Bredeney                   | SSS                         | 1  | 0.4 |
| Human | Coeln                      | AMP-SSS                     | 1  | 0.4 |
| Human | Coeln                      | STR                         | 1  | 0.4 |
| Human | Coeln                      | TAZ-SSS                     | 1  | 0.4 |
| Human | Derby                      | SSS                         | 1  | 0.4 |
| Human | Derby                      | SSS-TET                     | 1  | 0.4 |
| Human | Derby                      | TET-TGC                     | 1  | 0.4 |
| Human | Drogana                    | SSS                         | 1  | 0.4 |
| Human | Enteritidis                | AMP-STR-SSS-NAL             | 1  | 0.4 |
| Human | Enteritidis                | SSS                         | 2  | 0.8 |
| Human | Enteritidis                | SSS-NAL                     | 1  | 0.4 |
| Human | Give                       | SSS-SXT                     | 1  | 0.4 |
| Human | Goldcoast                  | AMP-CHL-STR-SSS             | 1  | 0.4 |
| Human | Hadar                      | AMP-STR-SSS-TET-NAL         | 1  | 0.4 |
| Human | Infantis                   | AMP-SSS-TET-NAL             | 1  | 0.4 |
| Human | Infantis                   | CIP                         | 1  | 0.4 |
| Human | Infantis                   | CIP-STR-SSS-TET-NAL-SXT     | 2  | 0.8 |

|       |                                                       |                                 |   |     |
|-------|-------------------------------------------------------|---------------------------------|---|-----|
| Human | Infantis                                              | SSS                             | 1 | 0.4 |
| Human | Infantis                                              | SSS-TET-NAL                     | 1 | 0.4 |
| Human | Kentucky                                              | AMP-CIP-GEN-STR-SSS-TET-NAL     | 1 | 0.4 |
| Human | Mbandaka                                              | GEN                             | 1 | 0.4 |
| Human | Napoli                                                | AMP-STR-SSS                     | 1 | 0.4 |
| Human | Napoli                                                | AMP-TAZ-CHL-STR-SSS-TET         | 1 | 0.4 |
| Human | Napoli                                                | GEN                             | 2 | 0.8 |
| Human | Napoli                                                | SSS                             | 5 | 1.9 |
| Human | Othmarschen                                           | AMP-FOX-TAZ-CIP-SSS             | 1 | 0.4 |
| Human | Othmarschen                                           | SSS                             | 1 | 0.4 |
| Human | Rissen                                                | AMP-GEN-TET-TGC                 | 2 | 0.8 |
| Human | Rissen                                                | AMP-CIP-TET-NAL                 | 1 | 0.4 |
| Human | Rissen                                                | CHL-TET-TGC                     | 1 | 0.4 |
| Human | Rissen                                                | SSS-TET                         | 2 | 0.8 |
| Human | Rissen                                                | STR-SSS                         | 1 | 0.4 |
| Human | Rissen                                                | TET                             | 2 | 0.8 |
| Human | Rissen                                                | TET-TGC                         | 1 | 0.4 |
| Human | Senftenberg                                           | FOT                             | 1 | 0.4 |
| Human | Thompson                                              | SSS                             | 1 | 0.4 |
| Human | Thompson                                              | TAZ                             | 1 | 0.4 |
| Human | Typhi                                                 | AMP-CHL-CIP-STR-SSS-NAL-SXT     | 1 | 0.4 |
| Human | Typhi                                                 | CIP-NAL                         | 1 | 0.4 |
| Human | Typhimurium                                           | AMC-AMP-CHL-STR-SSS-SXT         | 1 | 0.4 |
| Human | Typhimurium                                           | AMC-AMP-CHL-STR-TET-TGC         | 2 | 0.8 |
| Human | Typhimurium                                           | AMC-AMP-CIP-CHL-GEN-STR-TET-TGC | 1 | 0.4 |
| Human | Typhimurium                                           | AMC-AMP-STR-SSS-TET-NAL         | 1 | 0.4 |
| Human | Typhimurium                                           | AMP                             | 1 | 0.4 |
| Human | Typhimurium                                           | AMP-CHL                         | 1 | 0.4 |
| Human | Typhimurium                                           | AMP-CHL-SSS-TET                 | 1 | 0.4 |
| Human | Typhimurium                                           | AMP-CHL-STR-SSS-TET             | 5 | 1.9 |
| Human | Typhimurium                                           | AMP-SSS                         | 1 | 0.4 |
| Human | Typhimurium                                           | AMP-STR-SSS-TET                 | 1 | 0.4 |
| Human | Typhimurium                                           | AMP-TAZ-CIP-CHL-STR-SSS-TET-NAL | 1 | 0.4 |
| Human | Typhimurium                                           | FOX-SSS                         | 1 | 0.4 |
| Human | Typhimurium                                           | SSS                             | 2 | 0.8 |
| Human | Typhimurium                                           | STR-SSS-TET                     | 2 | 0.8 |
| Human | Typhimurium                                           | STR-TET-TGC                     | 2 | 0.8 |
| Human | Virchow                                               | SSS-NAL                         | 1 | 0.4 |
| Human | <i>S. enterica</i> subsp. <i>enterica</i> (non-typed) | AMC-FOX-SSS                     | 1 | 0.4 |
| Human | <i>S. enterica</i> subsp. <i>enterica</i> (non-typed) | SSS                             | 3 | 1.2 |
| Human | <i>S. enterica</i> subsp. <i>enterica</i> (non-typed) | AMP-CHL-GEN-STR-TET-TGC         | 1 | 0.4 |
| Human | <i>S. enterica</i> subsp. <i>diarizonae</i>           | STR                             | 1 | 0.4 |
| Human | <i>S. enterica</i> subsp. <i>salamae</i>              | SSS                             | 1 | 0.4 |

|           |                               |     |   |     |
|-----------|-------------------------------|-----|---|-----|
| Wild boar | S. enterica subsp. houtenae   | SXT | 1 | 0.4 |
| Wild boar | S. enterica subsp. diarizonae | SXT | 1 | 0.4 |
| Wild boar | S. enterica subsp. houtenae   | SXT | 1 | 0.4 |
